# Supplementary material
Source: publisher figshare collection journal article supplement (https://frontiersin.figshare.com/ndownloader/files/34304618)
Supplement: Supplementary file 1 [file 34304618]

## Sheet: Table S2 - legend
Table S2. Sediment core layers for carbon-14 dating ("layers fo dating") and calculated dates for the used samples in the study ("dates of the layers (samples)")
Age model is presented in supplementary Figure S1.

## Sheet: layers for dating
Core layer (top->bottom)	Dated material	δ13C ‰	CONV.14C Age (Year BP)	Reservoir effect (year)**	Reservoir-corrected 14C Ages
1-2 cm	OM	-23.8	1360±30	1414	-54±30
17-18 cm	OM	-23.4	1860±30	1579	281±30
30.5-31cm	OM	-24.4	1940±30	1579	361±30
44.5-45.5 cm	OM	-23.8	2560±30	1790	770±30
51-51.5 cm	OM	-24.8	2980±30	1790	1190±30
63-63.5 cm	OM	-25.2	3760±30	1790	1970±30
71-72 cm*	OM	-24.1	10120±40	1790	8330±40
100-100.5 cm*	OM	-23.7	10510±30	1790	8720±30
107-108 cm*	OM	-23.7	10750±30	1790	8960±30
*Dating for layers in red font were considered as unreliable due to a huge date gap, thus age remained unspecified for the layers >63.5 cm.
**The different Reservoir errors for the upper ages are related to a linear regression towards zero BP at the depth of the 1950 value. The lower ages have the highest but constant reservoir errors.
Figure. The middle part of the sediment core (52 to 70 cm) is characterized by a black,
poorly sorted sand layer ranging from angular to sub-rounded grains (5 to 2 mm),
composed mainly of glass and quartz minerals.
Large age gaps of ~6,000 years between 63.5 and 71 cm suggested that hiatus may exist.

## Sheet: dates of the layers (samples)
core layer depth (cm)	Year (CE),weighted mean [-> sample name]		Year (CE) maximum estimation	Year (CE) minimum estimation	Year (CE) weighted mean
0-1	2019		2021.9	2016	2018.9
1-2	2010		2017.2	2004.7	2010.3
2-3	2002		2014.9	1991.6	2001.7
3-4	1993		2012.8	1978.3	1993.1
4-5	1985		2010.6	1965	1984.5
5-6	1976		2008.6	1951.4	1975.9
6-7	1971		1997	1950.5	1970.6
7-8	1965		1985.4	1949.4	1965.3
8-9	1960		1974.1	1948.2	1960
9-10	1955		1964.2	1946.7	1954.6	MRT breaking point
10-11	1949		1956.9	1943.9	1949.3
11-12	1926		1942.7	1895.6	1926
12-13	1903		1939.3	1836	1903
13-14	1880		1936.1	1776.4	1880.1
14-15	1857		1932.7	1716.9	1857
15-16	1834		1929.2	1656.8	1833.9
16-17	1806		1896.7	1644.2	1806.3
17-18	1778		1869	1629	1778.1
18-19	1750		1851.3	1607.8	1750
19-20	1722		1835.1	1579	1721.9
20-21	1694		1820.4	1540.7	1694
21-22	1678		1803.4	1531.1	1678.4
22-23	1663		1782.3	1520.6	1662.6
23-24	1647		1767.4	1507.6	1646.7
24-25	1631		1760.6	1492.8	1630.9
25-26	1615		1754.2	1474.3	1615.3
26-27	1600		1732	1469.9	1600
27-28	1584		1716.4	1464.1	1584.4
28-29	1569		1702.4	1456.9	1569.1
29-30	1554		1689.8	1446.5	1553.7
30-31	1539		1680.1	1433.3	1538.8
31-32	1522		1648	1427.2	1522.4
32-33	1506		1623.6	1420.3	1505.9
33-34	1489		1604.2	1409.3	1489.3
34-35	1473		1590.6	1389.6	1472.7
35-36	1456		1581	1358.3	1456.2
36-37	1436		1558	1342.5	1436.3
37-38	1416		1540.2	1316.4	1416.2
38-39	1396		1524.8	1287.3	1396.3
39-40	1377		1513.8	1252.6	1377.2
40-41	1358		1503	1214.3	1358
41-42	1337		1470.2	1200.1	1337.3
42-43	1316		1443.5	1179.2	1316.2
43-44	1296		1422.9	1156.2	1295.5
44-45	1275		1402.5	1130.1	1275
45-46	1255		1383.7	1097.1	1254.6
46-47	1218		1302.1	1061.9	1218
47-48	1181		1238.3	1024.2	1180.6
48-49	1143		1213	983.7	1143.2
49-50	1106		1199.6	947.8	1106
50-51	1070		1189.9	877.2	1069.6
